# Supplementary material for: Prediction of Single Disc Seeding System Forces, Using a Semi-Analytical and Discrete Element Method (DEM)
Source: MDPI journal article supplement (doi:10.3390/agriculture13010206), 2023-01-13
Supplement: s1 [file s1]

## Test Results of Full and Cut Blades

**Table S1.** Measured force and furrow area of whole / partial disc blades at different settings.

| SSweep angle (°) | Tilt angle (°) | Depth (mm) | Draught (N) |         | Vertical (N) |         | Side (N) |         | Furrow area (mm <sup>2</sup> ) |         |
|------------------|----------------|------------|-------------|---------|--------------|---------|----------|---------|--------------------------------|---------|
|                  |                |            | Whole       | Partial | Whole        | Partial | Whole    | Partial | Whole                          | Partial |
| 5                | 0              | 40         | 210         | 173     | 78           | 57      | 75       | 60      | 1072                           | 819     |
| 5                | 0              | 80         | 477         | 367     | 120          | 88      | 292      | 237     | 4067                           | 3707    |
| 5                | 0              | 60         | 332         | 251     | 114          | 78      | 174      | 131     | 2513                           | 2401    |
| 10               | 0              | 60         | 325         | 241     | 75           | 71      | 256      | 234     | 3493                           | 2926    |
| 5                | 20             | 60         | 313         | 245     | 118          | 122     | -19      | -22     | 2298                           | 1860    |
| 10               | 20             | 60         | 231         | 177     | 26           | 31      | 130      | 109     | 3230                           | 2952    |

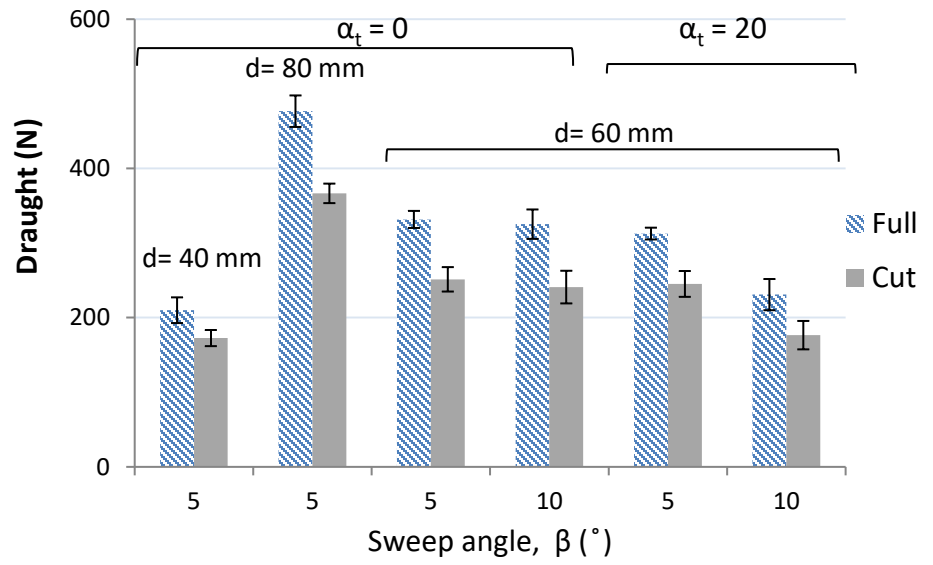

**Figure S1.** Measured draught force of (Full) whole / partial disc blades at different settings (Note: error bars represent 95% confidence interval of the mean).

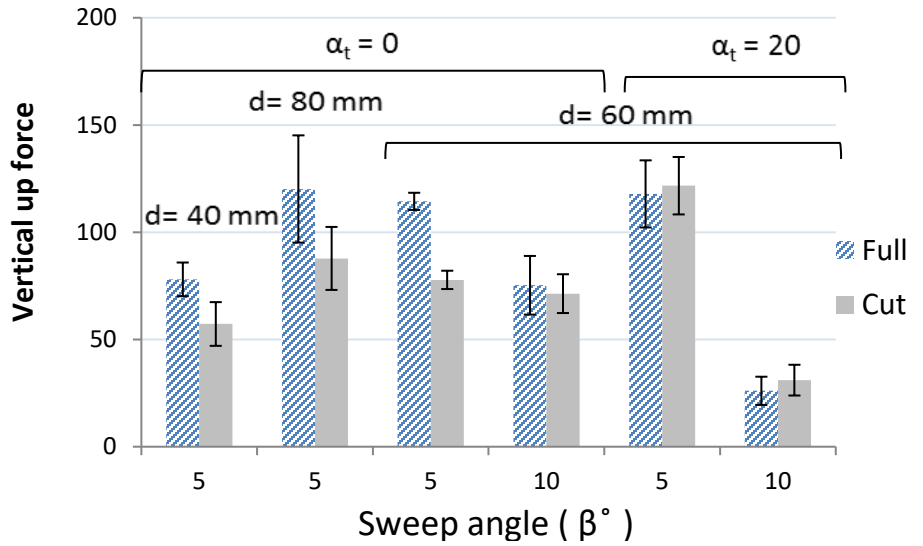

**Figure S2.** Measured vertical force of whole / partial disc at different settings (Note: error bars represent 95% confidence interval of the mean).

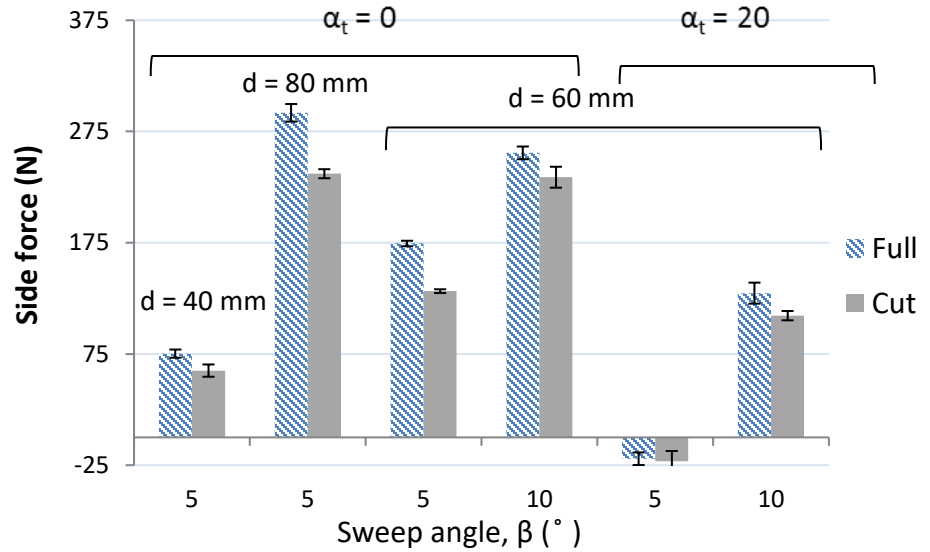

**Figure S3.** Measured side force of whole / partial (cut) disc at different settings (Note: error bars represent 95% confidence interval of the mean) .

As Figure S4 shows, the furrow area created by the cut-away disc blade was 13.5% smaller than that under the whole disc blade, being significant ( $P < 0.05$ ) on average. This reinforces the previous observations based on soil forces that, while the forward half of the soil-disc interface generates the majority of the soil failure work as anticipated, in practice a slightly greater proportion is involved in achieving the full furrow size.

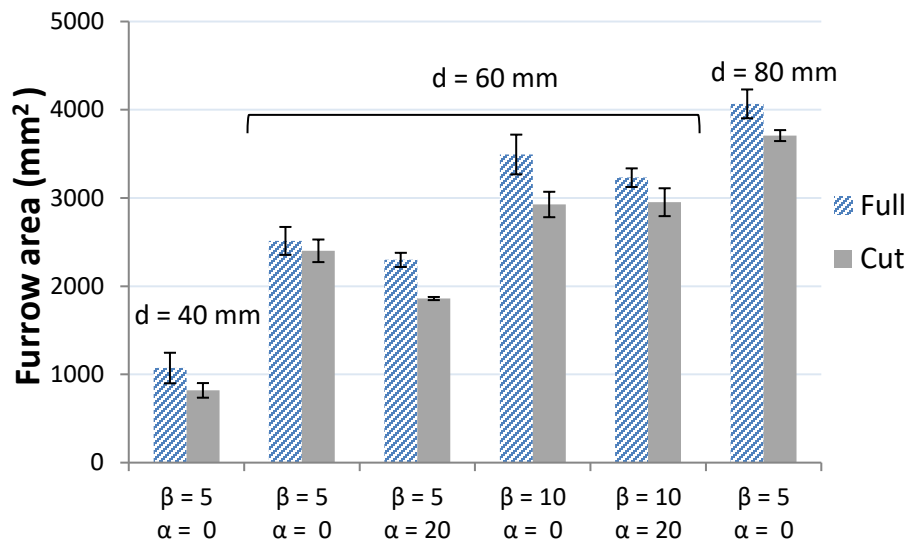

**Figure S4.** Comparison of furrow area of full and partial disc (error bars represent 95% confidence interval of the mean).
